# Supplementary material
Source: publisher site journal article supplement (https://www.dovepress.com/article/229076)
Supplement: Supplementary file 1 [file get_supplementary_file.php]

Table S1. Primers and cutting site for restriction enzyme in gene amplification and construction of overexpression plasmids.

| Primers | Sequences（5’—3’） |
| --- | --- |
| Myc-Tubulin-F | CGGAATTCATAGTAGTTATACAGCTCAGTTCC（*Eco*R I） |
| Myc-Tubulin-R | ATCTCGAGAGACTTGTGAACAAAATTGGATC（*Xho* I） |
| GST-Cx43-F | CGGAATTCATGGGTGACTGGAGCGCCTTAGGCA（*Eco*R I） |
| GST-Cx43-R | ATCTCGAGCTAGATCTCCAGGTCATCAGGC（*Xho* I） |

Table S2. Upstream primers and downstream primers in quantitative RT-PCR.

| Genes | Up-stream primers（5’-3’） | Down-stream primers（5’-3’） |
| --- | --- | --- |
| *GAPDH* | CATCACTGCCACCCAGAAGACTG | ATGCCAGTGAGCTTCCCGTTCAG |
| *Cx43* | ATTCTTTAGGCGCGAATGTG | TACGTGCTGCTAAGGCACTG |
| *ITGAV* | TAGCAGCACGTAAATATTGGCG | CGCAAGGATGACACGCAAATTCGT |
| *ITGA9* | CCTCTGTTAGTTTTGCATAGTTGC | CAGGCCACCATCAGTTTTG |
| *ITGA11* | AAGTGCTTATAGTGCAGGTA | TGTCAACGATACGCTACG |
| *P-gp* | AAGCGACTGAATGTTCAGTGGCTC | TAGTGCTATATTTATTAGGCAG |
| *BCRP* | GTACTGGGACTGGTTATAGGTGCC | TATCCGCTGATGTATTCATGTA |
| *Txr1* | GGTATCCAGGATGCCAACCGTTGG | TATCACTGCTGGTCCAACCATGC |
| *α-tubulin* | CACTGGCTTCAAGGTTGGCATCA | ATCAGGTCAAACTTGTGGTCCAG |
| *TSP1* | GTCAACTGTGATCCTGGACTCGCT | AAGCGGCTGCTGGACTGGTAGCC |
| *Bcl-2* | CATGTGTGTGGAGAGCGTCAACC | ATCAAACAGAGGCCGCATGCTG |
| *β-tubulin* | ATGAGACCTACTGCATCGACAACG | CTTGCGCAGGTCAGCGTTGAGCTG |
